# Supplementary material for: ZnuA and zinc homeostasis in Pseudomonas aeruginosa
Source: PubMed Central journal article supplement (PMC4542158; doi:10.1038/srep13139), 2015-08-20
Supplement: srep13139-s1.pdf [file srep13139-s1.pdf]

1 *ZnuA and zinc homeostasis in Pseudomonas aeruginosa*

2

3 Victoria G. Pederick <sup>1\*</sup>, Bart A. Eijkelkamp <sup>1\*</sup>, Stephanie L. Begg <sup>1</sup>, Miranda P. Ween <sup>1</sup>, Lauren J.

4 McAllister <sup>1</sup>, James C. Paton <sup>1</sup> and Christopher A. McDevitt <sup>1</sup>

5

6 1. Research Centre for Infectious Diseases, School of Molecular and Biomedical Science,

7 University of Adelaide, Adelaide, South Australia, Australia.

8

9 Corresponding author: Christopher A. McDevitt, Research Centre for Infectious Diseases, School

10 of Molecular and Biomedical Science, University of Adelaide, Adelaide, SA, 5005, Australia.

11 Phone: +61 8 8313 0413; Fax: +61 8 8303 7532; Email: christopher.mcdevitt@adelaide.edu.au

12 \* Contributed equally

13

14

15

16 **Supplementary Data**

17 Supplementary Tables S1-S2

18 Supplementary Figures S1-S4

19

20 **SUPPLEMENTARY TABLES**

21

22 **Supplementary Table S1. PAO1 Zur binding site sequences**

| <b>Locus tag</b> | <b>Putative Zur binding site</b> |
|------------------|----------------------------------|
| PA0781           | AAGAAATAATATAACAT                |
| PA1921/22        | AAGTTATAACATAACAT                |
| PA2911           | ATGTTATACTATAACAA                |
| PA3601           | ATGTTATATAGTTACAT                |
| PA4063           | TCGTTATAACGTAACAA                |
| PA4837/38        | ATGATATACTATAACGC                |
| PA5498/99        | ACGTTATTATATTACCC                |
| PA5536/37        | ACGTTATACTATAACAA                |
| PA5539           | ACGTTATATTATAACAT                |

23

24

25 **Supplementary Table S2. Oligonucleotide primers used in this study**

| Name           | Target          | Sequence (5' → 3')                          | Source                          |
|----------------|-----------------|---------------------------------------------|---------------------------------|
| Gm-F           | Gm <sup>R</sup> | CGAATTAGCTTCAAAAGCGCTCTGA                   | (Choi & Schweizer, 2005)        |
| Gm-R           | Gm <sup>R</sup> | CGAATTGGGGATCTTGAAGTTCCT                    | (Choi & Schweizer, 2005)        |
| GW-attB1       |                 | GGGACAAGTTTGTACAAAAAAGCAGGCT                | (Choi & Schweizer, 2005)        |
| GW-attB2       |                 | GGGACCACTTTGTACAAGAAAGCTGGGT                | (Choi & Schweizer, 2005)        |
| PA5498-UpF-GWL | PA5498          | TACAAAAAAGCAGGCTCCCTGCGTCCCTTTGCC           | This study                      |
| PA5498-UpR-GW  | PA5498          | TCAGAGCGCTTTTGAAGCTAATTCGGAAATTGACGAACTTGCG | This study                      |
| PA5498-DnF-GW  | PA5498          | AGGAACTTCAAGATCCCCAATTCGCTTGCCGGCAAGCCTTTC  | This study                      |
| PA5498-DnR-GWR | PA5498          | TACAAGAAAGCTGGGTGCGTCCACGCTCACGTTC          | This study                      |
| qPA0576_F      | <i>rpoD</i>     | CGATATAGCCGCTGAGGA                          | (Pederick <i>et al.</i> , 2014) |
| qPA0576_R      | <i>rpoD</i>     | GAGATCGAAATCGCCAAG                          | (Pederick <i>et al.</i> , 2014) |
| qPA0781_F      | <i>znuD</i>     | GAACGCCGCTGTAGAGGTAT                        | This study                      |
| qPA0781_R      | <i>znuD</i>     | ACAGCCGCTTCTCCAACACTAC                      | This study                      |
| qPA4063_F      | PA4063          | CTGTTAGCCCTCGTCTTGCT                        | This study                      |
| qPA4063_R      | PA4063          | AGCTCCAGTTCGAGGGTCTT                        | This study                      |
| qPA2435_F      | <i>hmtA</i>     | GATCAGCAACACCAGCAACA                        | This study                      |
| qPA2435_R      | <i>hmtA</i>     | GCATCGAGATAACCCGTACC                        | This study                      |

|             |              |                                      |            |
|-------------|--------------|--------------------------------------|------------|
| qPA0779_F   | <i>asrA</i>  | GTCCAGGTAGTGGTCGAGGA                 | This study |
| qPA0779_R   | <i>asrA</i>  | GGAAGTCGAGGTGATGAACC                 | This study |
| qPA1927_F   | <i>metE</i>  | ACCCAGATCCATACGCACAT                 | This study |
| qPA1927_R   | <i>metE</i>  | GTTCGGGTAGTCGAACTGCT                 | This study |
| qPA3527_F   | <i>pyrC</i>  | GTCTTCGAGCACATCACCAC                 | This study |
| qPA3527_R   | <i>pyrC</i>  | TAGAAGTGCGGACGGATACC                 | This study |
| qPA3690_F   | <i>zntA</i>  | GAGTTGATCGAGGCGAAGTC                 | This study |
| qPA3690_R   | <i>zntA</i>  | GCTTCCAGTTCCACTTGCTT                 | This study |
| qPA5230_F   | PA5230       | GCGACGATGTTCTGGATGTA                 | This study |
| qPA5230_R   | PA5230       | TCGGCCTGTATACCTTCACC                 | This study |
| qPA0277_F   | PA0277       | GTACGCCTTCGATCTCGTTG                 | This study |
| qPA0277_R   | PA0277       | GTGCCGGTGAACAACAAGGT                 | This study |
| qPA5539_F   | <i>folE2</i> | GGAAGACTGCATCGGACT                   | This study |
| qPA5539_R   | <i>folE2</i> | CCTCGCAGAACATCAGGT                   | This study |
| qPA2911_F   | PA2911       | GCAACCTGATCACCCCTCA                  | This study |
| qPA2911_R   | PA2911       | CGCTGAGCAGCTTCTTCT                   | This study |
| qPA1544_F   | <i>anr</i>   | CGATGACCAGCAGATGAT                   | This study |
| qPA1544_R   | <i>anr</i>   | GACAGGTTGACCAGGAAG                   | This study |
| PA5498LIC1F | PA5498       | TGGGTGGTGGATTTCTGAGGTCAGCGTGCTGACC   | This study |
| PA5498LIC1R | PA5498       | TTGGAAGTATAAATTTCCGAGCTTTTCCAGACAGCC | This study |

26

27

28 SUPPLEMENTARY FIGURES

29

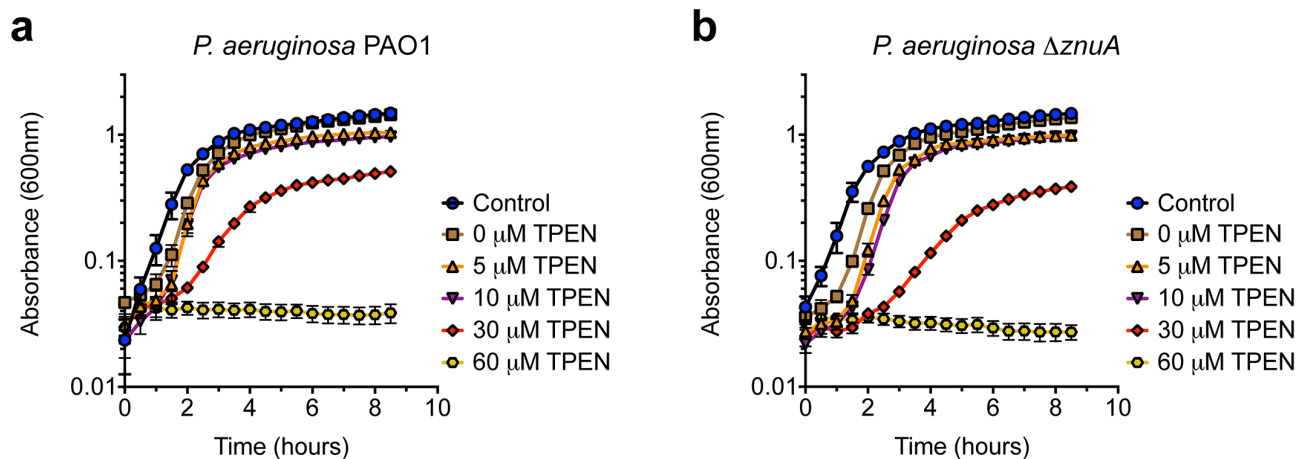

30

31 **Supplementary Figure S1. The effect of  $Zn^{2+}$  limitation on *P. aeruginosa* growth.** The growth  
32 phenotypes of *P. aeruginosa* PAO1 and the  $\Delta znuA$  strain (shown in Figure 1) were compared by  
33 absorbance at 600 nm. CDM overnight seed cultures were supplemented with 0  $\mu M$  TPEN (control)  
34 or 10  $\mu M$  TPEN (all other treatments), prior to growth analyses in CDM supplemented with  
35 additional TPEN with concentrations as indicated. The control treatment involved no TPEN  
36 supplementation. **(a)** *P. aeruginosa* PAO1 **(b)** *P. aeruginosa*  $\Delta znuA$ . Cultures were grown as  
37 indicated and, in all experiments, data are the mean  $\pm$  s.e.m. with  $n \geq 3$ .

38

39

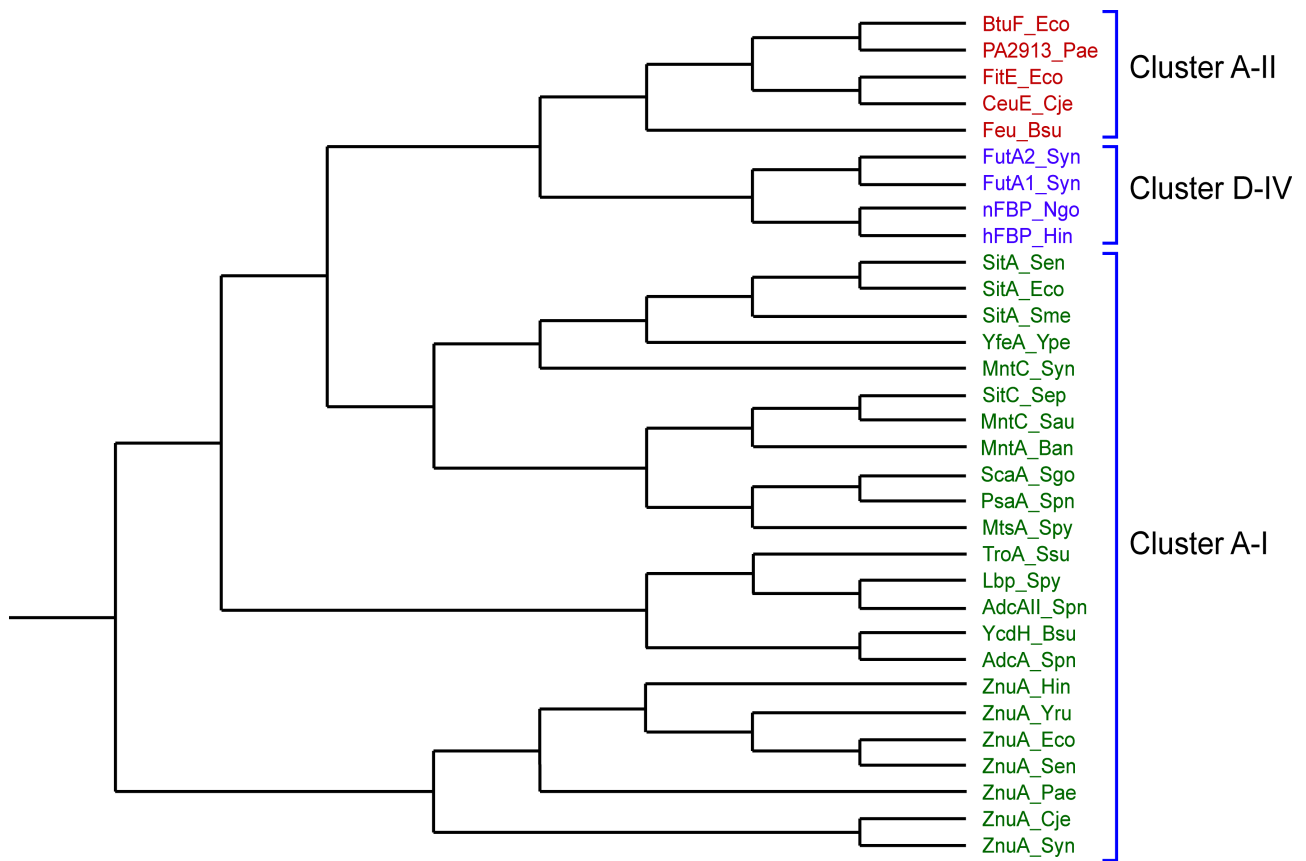

40

41

42 **Supplementary Figure S2. Phylogenetic tree of metal binding SBPs.** The phylogenetic  
 43 relationship between *P. aeruginosa* PA2913 and characterized cluster A-I, A-II and D-IV iron  
 44 binding SBPs was assessed. Amino acid sequences were aligned using ClustalW2 (Larkin *et al.*,  
 45 2007) and a phylogenetic tree constructed in CLC Sequence Viewer (Version 6.7.1) using the  
 46 Neighbor Joining method. Proteins clustered according to their SBP classification. All cluster A  
 47 SBPs feature a long  $\alpha$ -helical region that joins the two domains of the protein. They are further  
 48 subdivided into cluster A-I SBPs (green) that bind their metal ligand directly, and cluster A-II SBPs  
 49 (red) that bind a chelated form of their metal ligand. The cluster D-IV SBPs (purple) are an iron-  
 50 specific subset of cluster D proteins that bind iron (ferric or ferrous). BtuF\_Eco (GI: 215485321, *E.*  
 51 *coli*); PA2913\_Pae (GI: 15598109, *P. aeruginosa* PAO1) FitE\_Eco (GI: 190907145, *E. coli*);  
 52 Ceu\_Cje (GI: 112360670, *C. jejuni*); Feu\_Bsu (GI: 2632430, *B. subtilis*); FutA2\_Syn (GI:  
 53 170785083, *Synechocystis* PCC6803); FutA1\_Syn (GI: 152149369, *Synechocystis* PCC6803);  
 54 nFBP\_Ngo (GI: 28948320, *Neisseria gonorrhoeae*); hFBP\_Hin (GI: 157832046, *H. influenzae*);

55 SitA\_Sen (GI: 16761638, *S. enterica*); SitA\_Eco (GI: 84060846, *E. coli*); YfeA\_Ype (GI:  
56 51596671, *Y. pestis*); MntC\_Syn (GI: 16330511, *Synechocystis* PCC6803); SitC\_Sep (GI:  
57 27467323, *S. epidermis*); MntC\_Sau (GI: 88194402, *S. aureus*); MntA\_Ban (GI: 30263122, *B.*  
58 *anthracis*); ScaA\_Sgo (GI: 1168357, *Streptococcus gordonii*); PsaA\_Spn (GI: 182684593, *S.*  
59 *pneumoniae*); MtsA\_Spy (GI: 489075835, *S. pyrogenes*); TroA\_Ssu (GI: 330832169, *S. suis*);  
60 Lbp\_Spy (GI: 15675794, *S. pyrogenes*); AdcAII\_Spn (GI: 15902950, *S. pneumoniae*); YcdH\_Bsu  
61 (GI: 668752994, *B. subtilis*); AdcA\_Spn (GI: 15904016, *S. pneumoniae*); ZnuA\_Hin (GI:  
62 491963406, *H. influenzae*); ZnuA\_Yru (GI: 490857750, *Y. ruckeri*); ZnuA\_Eco (GI: 635897169, *E.*  
63 *coli*); ZnuA\_Sen (GI: 541470409, *S. enterica*); ZnuA\_Pae (GI: 15600691, *P. aeruginosa* PAO1);  
64 ZnuA\_Cje (GI: 504330062, *C. jejuni*), ZnuA\_Syn (GI: 499174152, *Synechocystis* PCC6803).  
65  
66



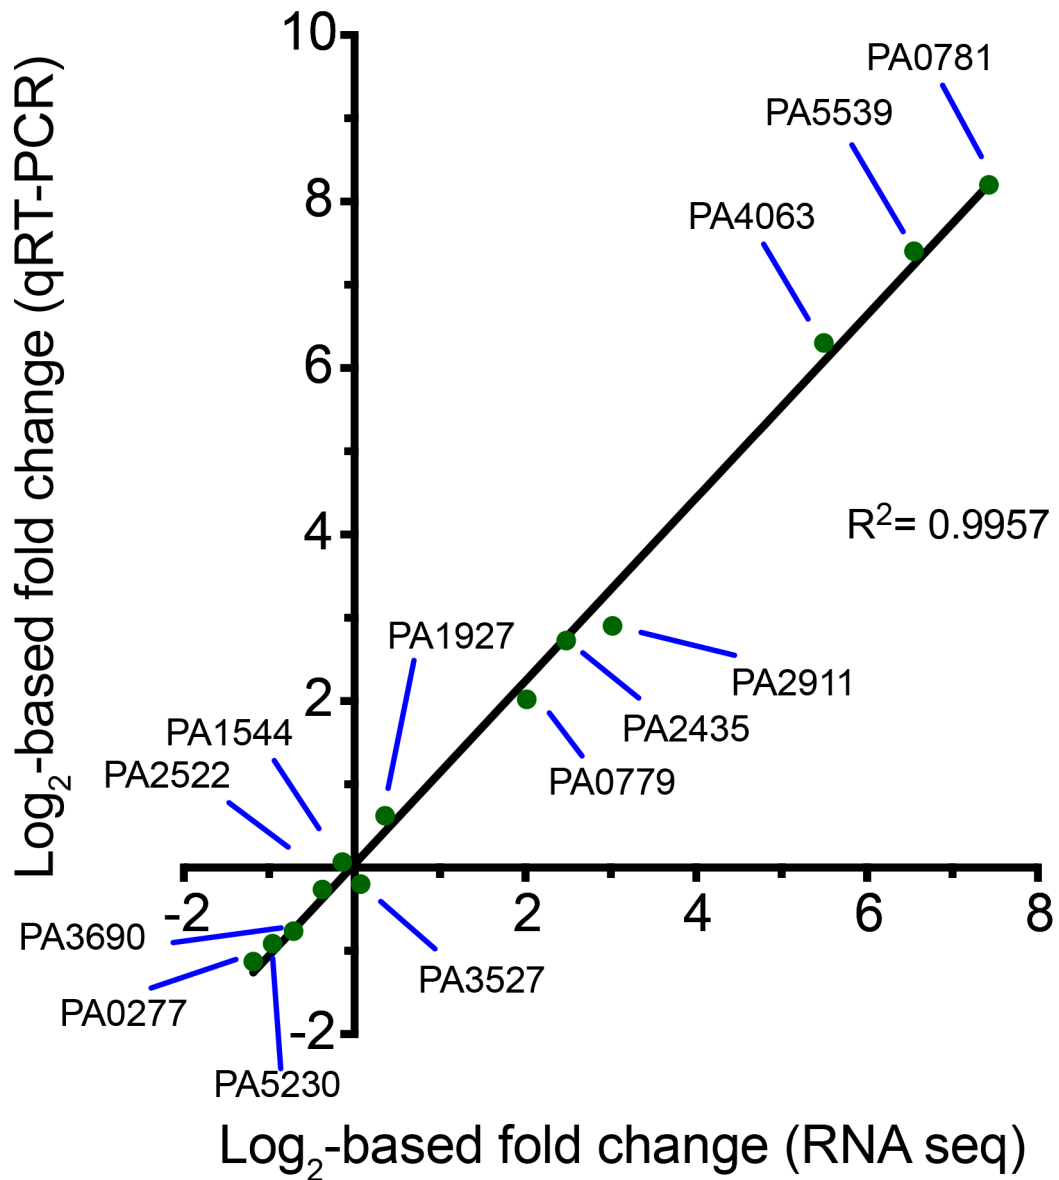

67

68

69 **Supplementary Figure S3. Validation of RNA sequencing results.** The differential expression of  
 70 genes as determined by RNA sequencing was confirmed by RT-qPCR analysis of *P. aeruginosa*  
 71 PAO1 and  $\Delta znuA$  samples grown in biological triplicate. Data are expressed as the mean log<sub>2</sub>-fold  
 72 change.

73

74

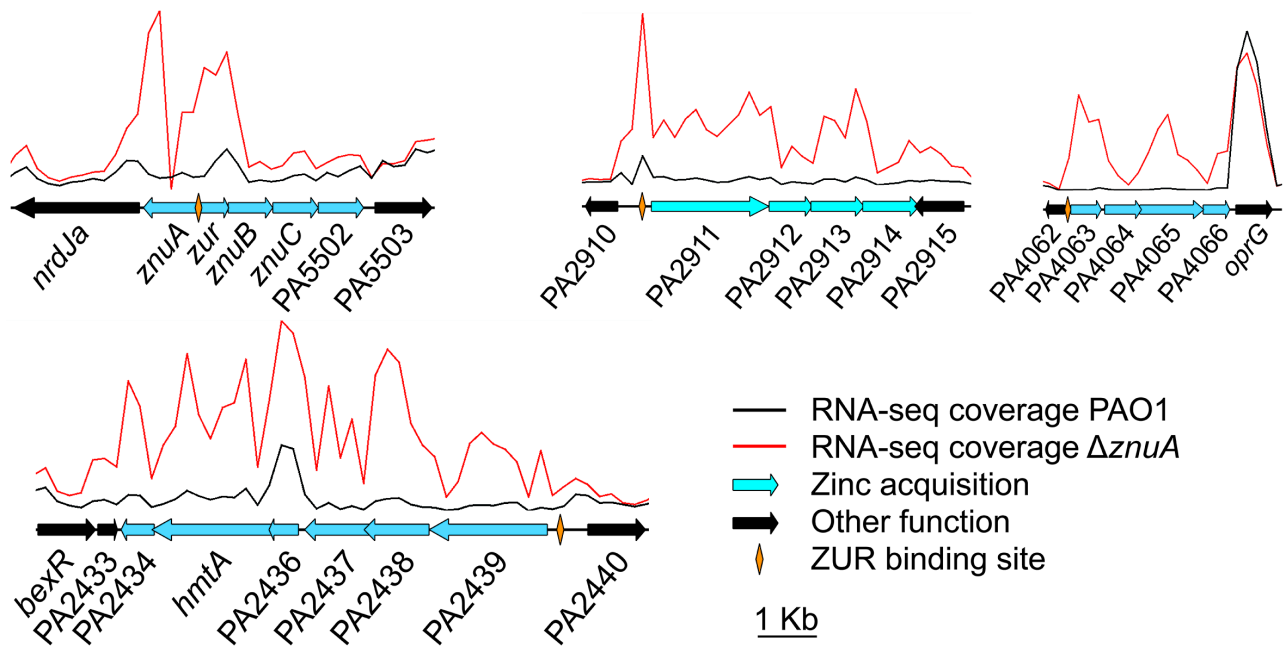

75

76

77 **Supplementary Figure S4. mRNA levels of putative  $Zn^{2+}$  acquisition clusters in *P. aeruginosa***

78 **PAO1.** Expression levels of the putative inner membrane  $Zn^{2+}$  acquisition gene clusters in the wild-

79 type (black) and  $\Delta znuA$  strain (red) as determined by RNA-sequencing. Genes proposed to exhibit

80 roles in  $Zn^{2+}$  acquisition appear as blue arrows, those with alternative functions appear as black

81 arrows and Zur binding sites are represented as orange diamonds. Genes are drawn to scale.

82
